# Supplementary material
Source: publisher figshare collection journal article supplement (https://sage.figshare.com/ndownloader/files/14210945)
Supplement: Supplementary file 1 [file 14210945]

## Appendix

**Table A1**  
**Sample Demographics for 18 Families in the New Jersey Families Study for Whom Data Has Been Collected**

| Gender of Target Child | Child Age (months) | Childcare Arrangement | Parent 1 Race | Parent 1 Education | Parent 2 Race | Parent 2 Education |
|------------------------|--------------------|-----------------------|---------------|--------------------|---------------|--------------------|
| Female                 | 46                 | Part-time: center     | Hispanic      | Graduate degree    | White         | College degree     |
| Female                 | 47                 | Part-time: center     | White         | Graduate degree    | White         | College degree     |
| Male                   | 47                 | Part-time: center     | White         | College degree     | Hispanic      | Graduate degree    |
| Female                 | 40                 | Full-time: center     | White         | College degree     | White         | College degree     |
| Female                 | 47                 | Live-in nanny         | Multiracial   | College degree     | Asian         | College degree     |
| Female                 | 42                 | Full-time: center     | Asian         | College degree     | Asian         | Graduate degree    |
| Female                 | 39                 | Full-time: center     | Black         | College degree     | Black         | Some college       |
| Female                 | 37                 | Part-time: center     | White         | Some college       | White         | HS Graduate        |
| Male                   | 58                 | Full-time: center     | Black         | Some college       | N/A           | N/A                |
| Female                 | 52                 | Full-time: center     | Black         | Some college       | Black         | Some college       |
| Male                   | 41                 | Full-time: center     | Black         | Graduate degree    | Multiracial   | College degree     |
| Female                 | 45                 | Part-time: center     | White         | Some college       | White         | Some college       |
| Male                   | 28                 | None                  | White         | Graduate degree    | Hispanic      | HS Graduate        |
| Female                 | 29                 | Full-time: center     | Black         | Some college       | N/A           | N/A                |
| Male                   | 55                 | Full-time: center     | Black         | HS Graduate        | N/A           | N/A                |
| Female                 | 38                 | Part-time: center     | Black         | Some college       | N/A           | N/A                |
| Female                 | 26                 | None                  | Black         | College degree     | Black         | HS Graduate        |
| Female                 | 41                 | Part-time: center     | White         | College            | White         | Graduate degree    |
